# Supplementary material
Source: Elsevier journal article supplement (https://www.sciencedirect.com/science/article/pii/S2530016419302514)
Supplement: mmc1 [file S2530016419302514:mmc1.docx]

**Short Title**

Nutrients, Hormones, and MCS

**Abstract**

The article by Aguilar-Aguilar provides new nutritional clinical data about patients with multiple chemical sensitivity (MCS). In our series of 164 patients, we found a high prevalence of hormonal disorders (41.5 percent, 68 of 164) associated with micronutrients deficiency, which were severely reduced, as reflected in plasma measurements. Water-soluble and/or fat-soluble vitamins (especially vitamins B) were undectable in very few cases until now. We believe that physicians should monitor their patients's hormone levels as well as micronutrients.

**Factores Dietéticos y Consecuencias Endocrinas del Sensibilidad Química Múltiple**

**Resumen**

El artículo de Aguilar-Aguilar proporciona nuevos datos clinicos nutricionales sobre los pacientes con sensibilidad química múltiple (SQM).En nuestra cohorte de 164 pacientes con SQM hemos encontrado una prevalencia elevada de trastornos hormonales (41.5 por ciento, 68 de 164) asociados a carencia de micronutrientes como se puede ver en los valores del plasma y del suero. Entonces, creemos que los médicos deberían monitorar los niveles hormonales y los micronutrientes de sus pacientes.
