# Supplementary material
Source: Elsevier journal article supplement (https://www.sciencedirect.com/science/article/pii/S2530016419302514)
Supplement: mmc2 [file S2530016419302514:mmc2.docx]

**Short Title**

Nutrients, Hormones, and MCS

**Abstract**

The article by Aguilar-Aguilar provides new nutritional clinical data about patients with multiple chemical sensitivity (MCS). In our series of **164** patients, we found a high prevalence of hormonal disorders (**41.5 percent, 68 of 164**) associated with micronutrients deficiency, which were severely reduced, as reflected in plasma measurements. Water-soluble and/or fat-soluble vitamins (especially vitamins B) were undectable in very few cases until now. We believe that physicians should monitor their patients's hormone levels as well as micronutrients.

**Factores Dietéticos y Consecuencias Endocrinas del Sensibilidad Química Múltiple**

**Resumen**

El artículo de Aguilar-Aguilar proporciona nuevos datos clinicos nutricionales sobre los pacientes con sensibilidad química múltiple (SQM).En nuestra cohorte de **164** pacientes con SQM hemos encontrado una prevalencia elevada de trastornos hormonales (**41.5 por ciento, 68 de 164**) asociados a carencia de micronutrientes como se puede ver en los valores del plasma y del suero. Entonces, creemos que los médicos deberían monitorar los niveles hormonales y los micronutrientes de sus pacientes.
